# Supplementary material for: Crab shell-derived nitrogen-doped micro-/mesoporous carbon as an effective separator coating for high energy lithium–sulfur batteries
Source: Royal Society of Chemistry journal article supplement (doi:10.1039/c7ta05192a), 2017-01-01
Supplement: c7ta05192a1.pdf [file c7ta05192a1.pdf]

## Crab shell-derived nitrogen-doped micro-/mesopores carbon as an effective separator coating for high energy lithium-sulfur batteries

Hongyuan Shao,<sup>a</sup> Fei Ai,<sup>a</sup> Weikun Wang,<sup>b</sup> Hao Zhang,<sup>b</sup> Anbang Wang,<sup>b</sup> Wang Feng<sup>\*,a</sup> and Yaqin Huang<sup>\*,a</sup>.

<sup>a</sup> State Key Laboratory of Chemical Resource Engineering, Beijing Laboratory of Biomedical Materials, Beijing University of Chemical Technology, Beijing 100029, People's Republic of China. \*E-mail: huangyq@mail.buct.edu.cn; wangf@mail.buct.edu.cn.

<sup>b</sup> Research Institute of Chemical Defense, Beijing 100191, PR China.

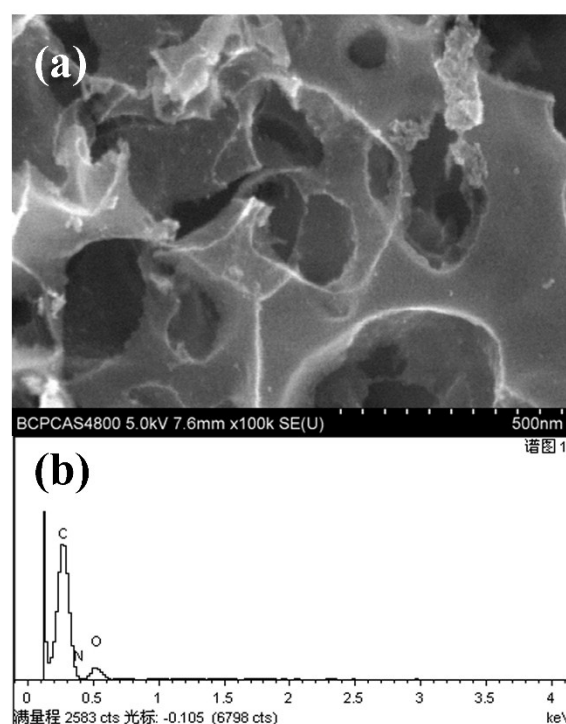

**Figure S1.** (a) SEM image and (b) EDS spectrum of N-MIMEC.

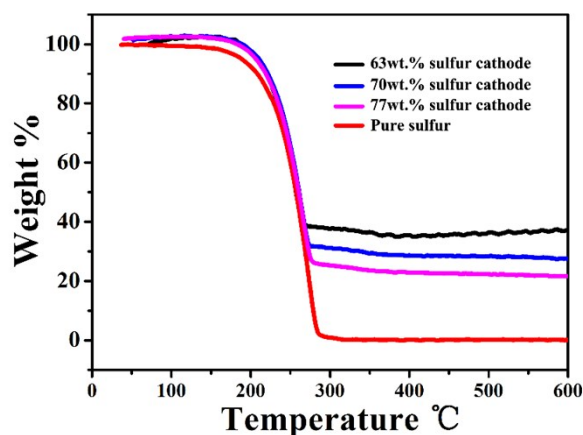

**Figure S2.** Thermogravimetric analysis (TG) of pure sulfur and cathodes with three different sulfur content under N<sub>2</sub> atmosphere at a heating rate of 10°C min<sup>-1</sup>.

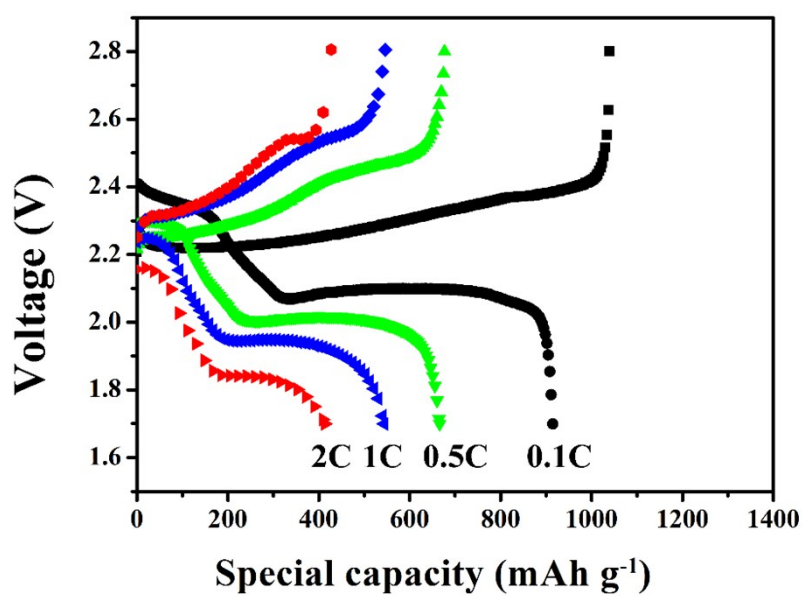

**Figure S3.** The galvanostatic discharge-charge voltage profiles cycled at different rates for normal battery.

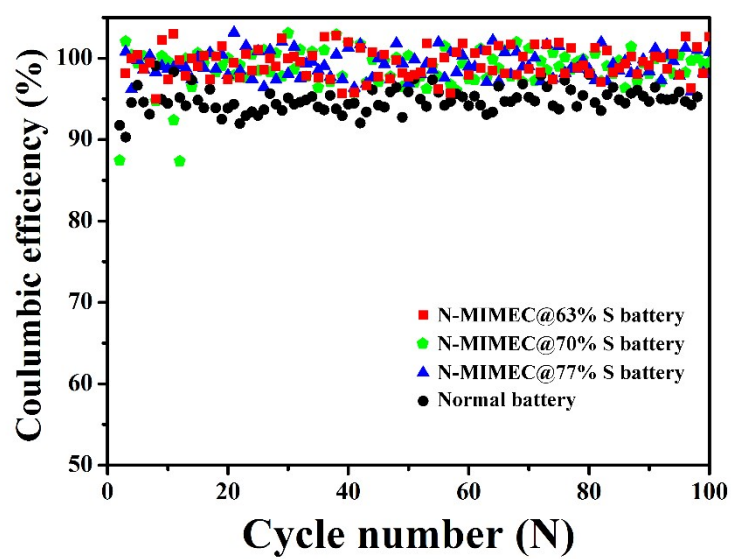

**Figure S4.** The coulombic efficiency of different batteries discharged at 0.1C for 100 cycles.

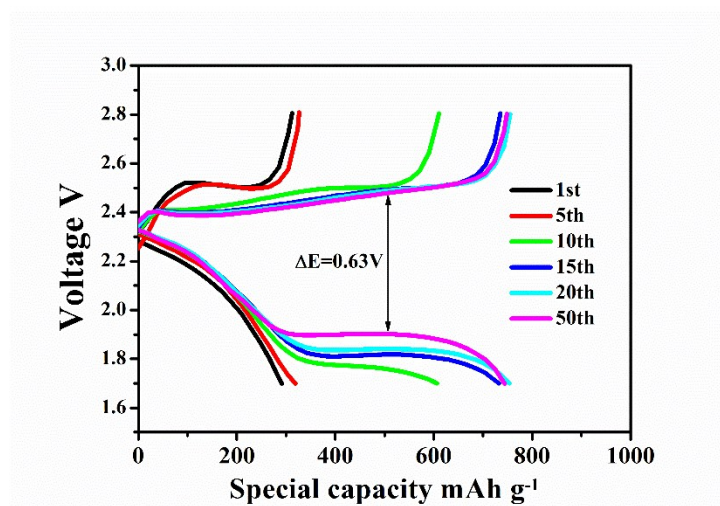

**Figure S5.** The corresponding charge/discharge plots of N-MIMEC@70% S battery cycled at 2.0C.

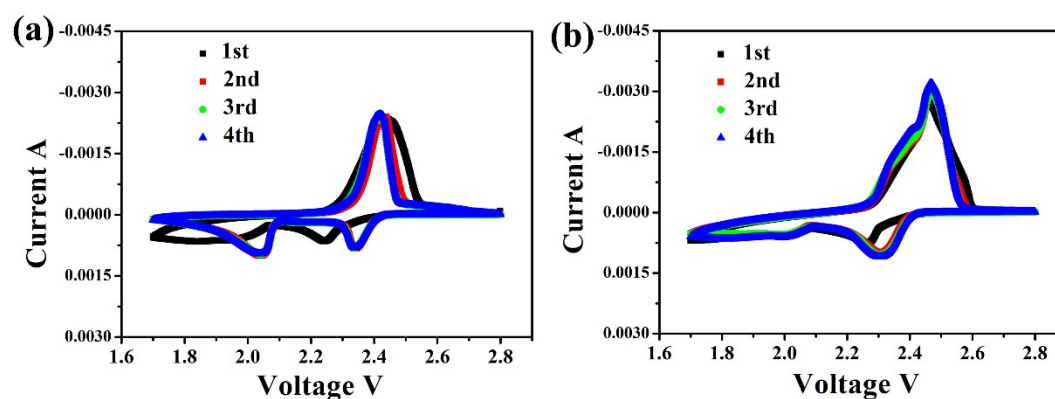

**Figure S6.** The CV curves of (a) N-MIMEC@70% S battery and (b) N-MIMEC@77% S battery.

**Table S1.** Comparison of the Li-S batteries with different modified separators, with results from

this work and from the literature.

| Modified separator | S loading (mg cm <sup>-2</sup> ) | S content | Coating weight (mg cm <sup>-2</sup> ) | Cycle Numbers | Reversible capacity (mAh g <sup>-1</sup> ) | Rate | Ref.      |
|--------------------|----------------------------------|-----------|---------------------------------------|---------------|--------------------------------------------|------|-----------|
| Super P            | 1.2                              | 60        | 0.2                                   | 200           | 828                                        | 0.2C | S1        |
| MWCNT              | 2.0                              | 70        | 0.17                                  | 300           | 621                                        | 0.2C | S2        |
| GO                 | 1.3                              | 63        | 0.12                                  | 100           | 708                                        | 0.1C | S3        |
| MPC/PEG            | 2                                | 70        | 0.15                                  | 500           | 596                                        | 0.2C | S4        |
| N-MIMEC            | 2                                | 63        | 0.2                                   | 100           | 971                                        | 0.1C | This work |
| N-MIMEC            | 2                                | 77        | 0.2                                   | 500           | 578                                        | 1.0C | This work |

## References

- S1. S. H. Chung and A. Manthiram, *J Phys Chem Lett*, 2014, **5**, 1978.
- S2. J. Q. Huang, T. Z. Zhuang, Q. Zhang, H. J. Peng, C. M. Chen and F. Wei, *Acs Nano*, 2016, **9**, 3002.
- S3. Y. S. Su and A. Manthiram, *Nat. Commun.*, 2012, **3**, 1166.
- S4. S. H. Chung and A. Manthiram, *Advanced Materials*, 2014, **26**, 7352.
